# Supplementary material for: Genomic and metagenomic analysis of microbes in a soil environment affected by the 2011 Great East Japan Earthquake tsunami
Source: PubMed Central journal article supplement (PMC4712596; doi:10.1186/s12864-016-2380-4), 2016-01-14
Supplement: 12864_2016_2380_MOESM1_ESM.pdf [file 12864_2016_2380_MOESM1_ESM.pdf]

Additional file 1: *Arthrobacter* dataset for comparative genome analysis.

| Species Name                           | Strain name | NCBI taxonomy ID | Isolated environment | Status   | Type strain | Total genome size (bp) | Number of scaffolds | GC content (%) | CDSs  | rRNA | tRNA |
|----------------------------------------|-------------|------------------|----------------------|----------|-------------|------------------------|---------------------|----------------|-------|------|------|
| <i>Arthrobacter arilaitensis</i>       | Re117       | 861360           | Cheese               | Complete | T           | 3,918,192              | 3                   | 59.3           | 3,736 | 18   | 64   |
| <i>Arthrobacter aurescens</i>          | TC1         | 290340           | Soil                 | Complete | F           | 5,226,648              | 3                   | 62.4           | 4,819 | 18   | 54   |
| <i>Arthrobacter castelli</i>           | DSM 16402   | 1121019          | Mural painting       | Draft    | T           | 4,582,606              | 52                  | 63.6           | 4,453 | 4    | 46   |
| <i>Arthrobacter chlorophenolicus</i>   | A6          | 452863           | Soil                 | Complete | T           | 4,980,870              | 3                   | 66             | 4,645 | 15   | 85   |
| <i>Arthrobacter crystallopoietes</i>   | BAB-32      | 1246476          | Soil                 | Draft    | F           | 4,348,607              | 347                 | 66.7           | 4,387 | 4    | 51   |
| <i>Arthrobacter gangotriensis</i>      | Lz1y        | 1276920          | Soil                 | Draft    | T           | 4,319,900              | 20                  | 63             | 4,029 | 4    | 58   |
| <i>Arthrobacter globiformis</i>        | NBRC 12137  | 1077972          | Soil                 | Draft    | T           | 4,954,410              | 125                 | 66.2           | 4,544 | 3    | 50   |
| <i>Arthrobacter phenanthrenivorans</i> | Sphe3       | 930171           | Soil                 | Complete | T           | 4,535,320              | 3                   | 65.4           | 4,246 | 12   | 50   |
| <i>Arthrobacter</i> sp.                | 131MFCo16.1 | 1157944          | Rhizosphere          | Draft    | F           | 4,432,383              | 29                  | 67.2           | 3,968 | 5    | 50   |
| <i>Arthrobacter</i> sp.                | 135MFCo15.1 | 1158050          | Rhizosphere          | Draft    | F           | 4,453,574              | 37                  | 66.1           | 4,083 | 7    | 50   |
| <i>Arthrobacter</i> sp.                | 161MFSHa2.1 | 1151118          | Rhizosphere          | Draft    | F           | 4,572,124              | 44                  | 63.1           | 4,295 | 6    | 54   |
| <i>Arthrobacter</i> sp.                | 162MFSHa1.1 | 1151119          | Rhizosphere          | Draft    | F           | 4,399,171              | 55                  | 66.1           | 4,107 | 6    | 51   |
| <i>Arthrobacter</i> sp.                | 35W         | 1132441          | Lake                 | Draft    | F           | 4,652,932              | 6                   | 66.8           | 4,103 | 12   | 54   |
| <i>Arthrobacter</i> sp.                | AK-YN10     | 1349820          | Soil                 | Draft    | F           | 4,839,751              | 107                 | 63.3           | 4,614 | 2    | 53   |
| <i>Arthrobacter</i> sp.                | CAL618      | 1055770          | Human                | Draft    | F           | 3,654,388              | 288                 | 63.2           | 3,642 | 18   | 47   |
| <i>Arthrobacter</i> sp.                | FB24        | 290399           | Soil                 | Complete | F           | 5,070,478              | 4                   | 65.4           | 4,624 | 15   | 51   |

|                         |          |         |              |          |   |           |     |      |       |    |    |
|-------------------------|----------|---------|--------------|----------|---|-----------|-----|------|-------|----|----|
| <i>Arthrobacter</i> sp. | Hiyo1    | 1588020 | (This study) | Draft    | F | 5,543,883 | 38  | 63.2 | 5,292 | 2  | 51 |
| <i>Arthrobacter</i> sp. | Hiyo4    | 1588021 | (This study) | Complete | F | 3,790,568 | 1   | 65   | 5,120 | 12 | 50 |
| <i>Arthrobacter</i> sp. | Hiyo6    | 1588022 | (This study) | Draft    | F | 2,594,729 | 630 | 63.3 | 3,767 | 3  | 33 |
| <i>Arthrobacter</i> sp. | Hiyo8    | 1588023 | (This study) | Complete | F | 4,698,617 | 3   | 63.8 | 7,041 | 15 | 53 |
| <i>Arthrobacter</i> sp. | M2012083 | 1197706 | Soil         | Draft    | F | 4,629,172 | 67  | 62   | 4,304 | 3  | 54 |
| <i>Arthrobacter</i> sp. | Rue61a   | 1118963 | Wastewater   | Complete | F | 5,081,038 | 3   | 62.2 | 4,723 | 18 | 53 |
| <i>Arthrobacter</i> sp. | SJCon    | 683150  | Soil         | Draft    | F | 4,389,620 | 142 | 66.2 | 4,635 | 3  | 50 |
| <i>Arthrobacter</i> sp. | TB 23    | 494419  | Sponge       | Draft    | F | 3,542,308 | 126 | 63.3 | 3,405 | 15 | 46 |
| <i>Arthrobacter</i> sp. | TB 26    | 494420  | Human        | Draft    | F | 4,324,615 | 556 | 66.4 | 4,451 | 19 | 50 |

---
