# Supplementary material for: Genomic and metagenomic analysis of microbes in a soil environment affected by the 2011 Great East Japan Earthquake tsunami
Source: PubMed Central journal article supplement (PMC4712596; doi:10.1186/s12864-016-2380-4), 2016-01-14
Supplement: 12864_2016_2380_MOESM2_ESM.pdf [file 12864_2016_2380_MOESM2_ESM.pdf]

**Additional file 2:** Relative abundance of functional gene categories in the *Arthrobacter* genomes.

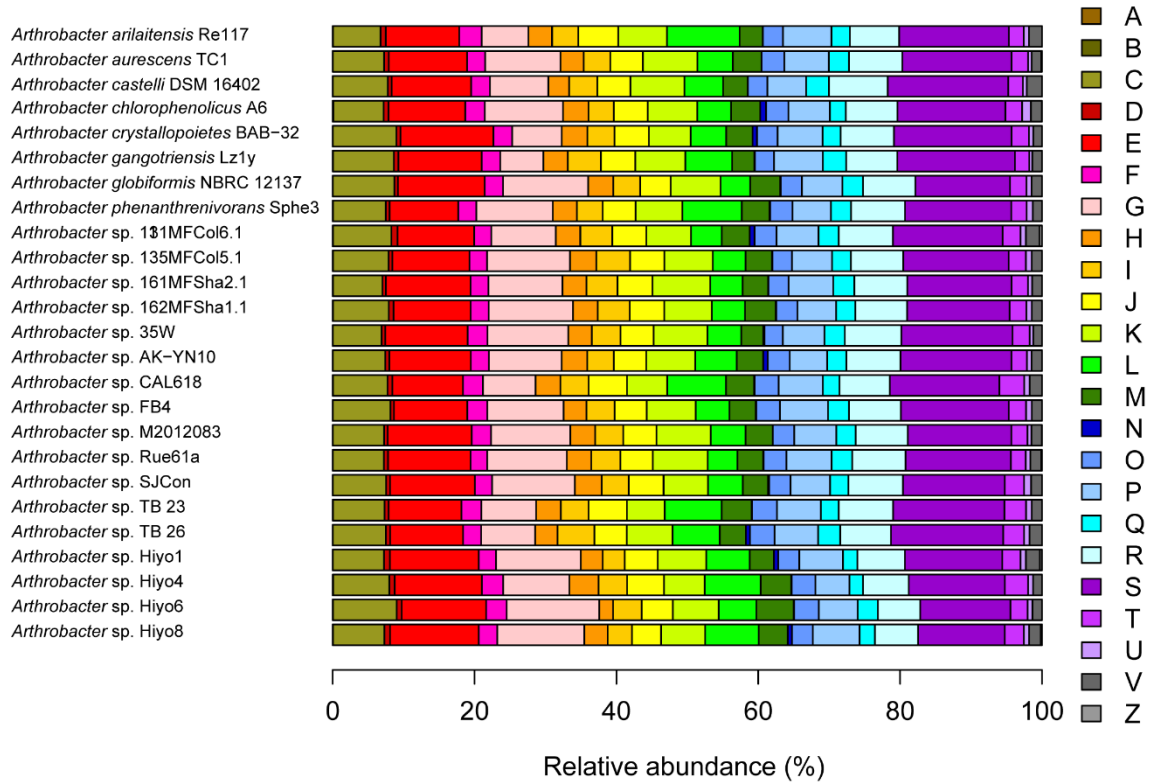

Relative abundance of CDSs assigned to each eggNOG functional category is plotted for each *Arthrobacter* genome. The eggNOG functional categories are as follows: A, RNA processing and modification; B, chromatin structure and dynamics; C, energy production and conversion; D, cell cycle control, cell division and chromosome partitioning; E, amino acid transport and metabolism; F, nucleotide transport and metabolism; G, carbohydrate transport and metabolism; H, coenzyme transport and metabolism; I, lipid transport and metabolism; J, translation; K, transcription; L, replication; M, cell wall/membrane/envelope biogenesis; N, cell motility; O, posttranslational modification, protein turnover, chaperones; P, inorganic ion transport and metabolism; Q, secondary metabolites biosynthesis, transport and catabolism; R, general function prediction only; S, function unknown; T, signal transduction mechanisms; U, intracellular trafficking and secretion; V, defense mechanisms; W, extracellular structures; Y, nuclear structure; and Z, cytoskeleton.
